# Supplementary material for: Impacts of land-use change on biospheric carbon: an oriented benchmark using the ORCHIDEE land surface model
Source: Copernicus journal article supplement (doi:10.5194/gmd-17-6725-2024), 2024-09-12
Supplement: Supplementary file 1 [file gmd-17-6725-2024-supplement.pdf]

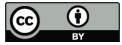

*Supplement of*

## **Impacts of land-use change on biospheric carbon: an oriented benchmark using the ORCHIDEE land surface model**

**Thi Lan Anh Dinh et al.**

*Correspondence to:* Thi Lan Anh Dinh (lananh.dinh@hotmail.com)

The copyright of individual parts of the supplement might differ from the article licence.

## Supplementary Material

### S1. Idealised land-use change (LUC) simulations using realistic land-use transition matrices

We performed additional simulations to account for transition years specific to each site. These simulations are similar to the idealised LUC simulations presented in Sect. 2.3.2, involving two main processes: (1) the spin-up simulation FG1 to establish the equilibrium state for each land cover type, and (2) the historical simulation FG2. In the second step, we conducted FG2 using land-use transition matrices instead of a fixed 1950 transition year. The land-use transition matrix is constructed based on the land cover change and transition year information. For example, to perform the LUC from forest to crop (e.g. Temperate needleleaf evergreen forest (TeNE) to C<sub>3</sub> crop (C<sub>3</sub>C)), the land cover is initially set to 100 % TeNE for all grid cells across Europe. Then, we adjusted this map to carry out the LUC by setting the land cover at the respective grid cell to 100 % C<sub>3</sub>C at the corresponding transition year. This grid cell is then kept constant for the remainder of the simulation time. The simulation stops at the observed experiment year.

The land-use transition matrices depend on the observed transition information. However, this information may not always be provided in the meta-analyses (Tab. 2). Only 53 of the 102 study sites have a specific LUC year reported. Therefore, sites without transition year information are excluded. Additionally, within one study or one observation field, observation sites are often very close to each other. On the other hand, the ORCHIDEE model has a spatial resolution of  $0.5^\circ \times 0.5^\circ$ . Therefore, if multiple observation sites are located in the same grid cell, only one sample is chosen. The final number of selected samples for each LUC transition case is shown in Fig. S5. Due to the limited number of samples, we do not conduct additional fitted carbon response functions (CRFs, see Sect. 2.4.2).

The comparisons of observed and simulated SOC changes for different LUC transitions are shown in Fig. S5. Here, we directly compared the observed absolute change in SOC with the corresponding simulated change for each selected site. The observed and simulated CRFs (see Tab. S6) that are based on available observation sites and the assumed LUC year 1950 are presented for comparison.

The simulated responses in both cases — with the individually reported transition years (Fig. S5) and the idealised transition year in 1950 (Fig. 6) — show similarities: the model aligns with the observed changes but underestimates the amount of carbon gained or lost. The improvement is not significant for several reasons. One major factor could be the absence of site historical information. Although the exact transition year is known, accurately reconstructing the land use history of a particular site is impossible. Additionally, most experiments utilise paired plots or chronosequences to compare two adjacent sites: one with the original land cover and the other with new land cover following LUC. On the other hand, our simulations consider only a single site within a grid cell, analysing its behaviour before and after the LUC. This approach is used to accommodate the current European scope of the analysis and to minimise computational costs. More realistic simulations incorporating detailed information on land use history at a site-specific scale would provide more precise and reliable results.

Table S1: Net primary production (NPP) sites from Luyssaert et al. (2007).

| ID | Site                  | Latitude ( $^{\circ}$ N) | Longitude ( $^{\circ}$ E) | Ecosystem type |
|----|-----------------------|--------------------------|---------------------------|----------------|
| 1  | Aheden                | 64.20                    | 19.50                     | Forest         |
| 2  | Aubure (F)            | 48.20                    | 7.18                      | Forest         |
| 3  | Aubure (P)            | 48.20                    | 7.18                      | Forest         |
| 4  | Belgium               | 51.20                    | 5.00                      | Forest         |
| 5  | Bornhoved Alder       | 54.10                    | 10.20                     | Forest         |
| 6  | Bornhoved Beech       | 54.10                    | 10.20                     | Forest         |
| 7  | Brasschaat Oak        | 51.30                    | 4.52                      | Forest         |
| 8  | Brasschaat Pine       | 51.30                    | 4.52                      | Forest         |
| 9  | Collelongo            | 41.80                    | 13.60                     | Forest         |
| 10 | Dooary                | 53.00                    | -7.30                     | Forest         |
| 11 | Finland 1             | 60.50                    | 23.90                     | Forest         |
| 12 | Finland 2             | 60.50                    | 23.90                     | Forest         |
| 13 | Flakaliden C          | 64.10                    | 19.50                     | Forest         |
| 14 | Flakaliden I + F      | 64.10                    | 19.50                     | Forest         |
| 15 | France                | 48.40                    | 2.70                      | Forest         |
| 16 | Gribskov              | 56.00                    | 12.30                     | Forest         |
| 17 | Hainich               | 51.10                    | 10.40                     | Forest         |
| 18 | Hesse                 | 48.70                    | 7.07                      | Forest         |
| 19 | Hestehaven            | 56.30                    | 10.50                     | Forest         |
| 20 | Hungary               | 47.90                    | 20.50                     | Forest         |
| 21 | Ilomantsi 1           | 62.80                    | 31.00                     | Forest         |
| 22 | Ilomantsi 2           | 62.80                    | 31.00                     | Forest         |
| 23 | Ilomantsi 3           | 62.80                    | 31.00                     | Forest         |
| 24 | Ilomantsi 4           | 62.80                    | 31.00                     | Forest         |
| 25 | Ispina Krakow         | 50.10                    | 20.40                     | Forest         |
| 26 | Jädraas C             | 60.80                    | 16.50                     | Forest         |
| 27 | Jädraas I + F         | 60.80                    | 16.50                     | Forest         |
| 28 | Jezeri                | 50.50                    | 13.50                     | Forest         |
| 29 | Kannenbruch Alder/Ash | 53.80                    | 10.60                     | Forest         |
| 30 | Kannenbruch Beech     | 53.80                    | 10.60                     | Forest         |
| 31 | Kannenbruch Oak       | 53.80                    | 10.60                     | Forest         |
| 32 | Karelia_1             | 62.00                    | 34.00                     | Forest         |
| 33 | Karelia_10            | 62.00                    | 34.00                     | Forest         |
| 34 | Karelia_11            | 62.00                    | 34.00                     | Forest         |
| 35 | Karelia_12            | 62.00                    | 34.00                     | Forest         |
| 36 | Karelia_13            | 62.00                    | 34.00                     | Forest         |
| 37 | Karelia_14            | 62.00                    | 34.00                     | Forest         |
| 38 | Karelia_15            | 62.00                    | 34.00                     | Forest         |
| 39 | Karelia_16            | 62.00                    | 34.00                     | Forest         |
| 40 | Karelia_17            | 62.00                    | 34.00                     | Forest         |
| 41 | Karelia_2             | 62.00                    | 34.00                     | Forest         |
| 42 | Karelia_3             | 62.00                    | 34.00                     | Forest         |
| 43 | Karelia_4             | 62.00                    | 34.00                     | Forest         |
| 44 | Karelia_5             | 62.00                    | 34.00                     | Forest         |
| 45 | Karelia_6             | 62.00                    | 34.00                     | Forest         |
| 46 | Karelia_7             | 62.00                    | 34.00                     | Forest         |
| 47 | Karelia_8             | 62.00                    | 34.00                     | Forest         |

Continued on next page

Table S1 – continued from previous page

| ID | Site                | Latitude (° N) | Longitude (° E) | Ecosystem type |
|----|---------------------|----------------|-----------------|----------------|
| 48 | Karelia_9           | 62.00          | 34.00           | Forest         |
| 49 | Klosterhede         | 56.50          | 8.40            | Forest         |
| 50 | Kongalund B         | 56.00          | 13.20           | Forest         |
| 51 | Kongalund S         | 56.00          | 13.20           | Forest         |
| 52 | Kuusamo             | 66.40          | 29.30           | Forest         |
| 53 | Langarod            | 55.80          | 13.90           | Forest         |
| 54 | Lei-135+15          | 51.30          | 10.40           | Forest         |
| 55 | Lei-30              | 51.30          | 10.40           | Forest         |
| 56 | Lei-62              | 51.30          | 10.40           | Forest         |
| 57 | Lei-T-111           | 51.30          | 10.40           | Forest         |
| 58 | Linnebjerg          | 55.70          | 13.30           | Forest         |
| 59 | Loobos              | 52.20          | 5.74            | Forest         |
| 60 | Meathop             | 54.20          | -2.90           | Forest         |
| 61 | Monte di Mezzo      | 41.80          | 14.90           | Forest         |
| 62 | Nacetin             | 50.60          | 13.30           | Forest         |
| 63 | Oved                | 55.70          | 13.60           | Forest         |
| 64 | Popface alba        | 42.40          | 11.80           | Forest         |
| 65 | Popface euamericana | 42.40          | 11.80           | Forest         |
| 66 | Popface nigra       | 42.40          | 11.80           | Forest         |
| 67 | Schacht             | 50.10          | 11.80           | Forest         |
| 68 | Skogaby             | 56.50          | 13.20           | Forest         |
| 69 | Solling             | 51.80          | 9.58            | Forest         |
| 70 | Soroe               | 55.50          | 11.60           | Forest         |
| 71 | Tharandt            | 51.00          | 13.60           | Forest         |
| 72 | Tharandt 24         | 50.90          | 13.50           | Forest         |
| 73 | Tharandt 42         | 50.90          | 13.50           | Forest         |
| 74 | Tharandt 5          | 50.90          | 13.50           | Forest         |
| 75 | Tharandt 97         | 50.90          | 13.50           | Forest         |
| 76 | Virelles            | 50.10          | 4.35            | Forest         |
| 77 | Waldstein           | 50.20          | 11.90           | Forest         |
| 78 | Wet-T-57            | 50.50          | 11.50           | Forest         |
| 79 | Wytham Woods        | 51.50          | -1.30           | Forest         |

Table S2: Gross primary production (GPP) sites from Luyssaert et al. (2007).

| ID | Site                    | Latitude (° N) | Longitude (° E) | Ecosystem type |
|----|-------------------------|----------------|-----------------|----------------|
| 1  | Aberfeldy/Griffins      | 56.60          | -3.78           | Forest         |
| 2  | Bayreuth/Weiden Brunnen | 50.15          | 11.87           | Forest         |
| 3  | Bilos                   | 44.49          | -0.96           | Forest         |
| 4  | Bilos Clear             | 44.48          | 0.87            | Forest         |
| 5  | Bily Kriz Forest        | 49.50          | 18.54           | Forest         |
| 6  | Bornhoved Alder         | 54.10          | 10.23           | Forest         |
| 7  | Bornhoved Beech         | 54.10          | 10.23           | Forest         |
| 8  | Brasschaat              | 51.31          | 4.52            | Forest         |
| 9  | Castelporziano          | 41.71          | 12.38           | Forest         |
| 10 | Collelongo              | 41.85          | 13.59           | Forest         |
| 11 | Dooary                  | 52.95          | -7.25           | Forest         |
| 12 | El Saler                | 39.35          | -0.32           | Forest         |
| 13 | Espirra                 | 38.64          | -8.60           | Forest         |
| 14 | Flakaliden C            | 64.12          | 19.45           | Forest         |
| 15 | Fyedorovskoye           | 56.45          | 32.92           | Forest         |
| 16 | Hainich                 | 51.08          | 10.45           | Forest         |
| 17 | Hampshire               | 51.12          | -0.86           | Forest         |
| 18 | Hardwood                | 55.10          | -2.05           | Forest         |
| 19 | Hardwood Clear          | 55.10          | -2.05           | Forest         |
| 20 | Hardwood.21             | 55.10          | -2.05           | Forest         |
| 21 | Hardwood.7              | 55.10          | -2.05           | Forest         |
| 22 | Hesse                   | 48.67          | 7.07            | Forest         |
| 23 | Hyytiala                | 61.85          | 24.30           | Forest         |
| 24 | Hyytiala 12             | 61.85          | 24.30           | Forest         |
| 25 | Hyytiala 75             | 61.85          | 24.30           | Forest         |
| 26 | Hyytiala Clear          | 61.85          | 24.30           | Forest         |
| 27 | Ilomantsi Mekrijärvi    | 62.78          | 30.97           | Forest         |
| 28 | Kannenbruch Alder/Ash   | 53.78          | 10.60           | Forest         |
| 29 | Kannenbruch Beech       | 53.78          | 10.60           | Forest         |
| 30 | Kannenbruch Oak         | 53.78          | 10.60           | Forest         |
| 31 | La Majadas del Tietar   | 39.94          | -5.77           | Forest         |
| 32 | La Mandria              | 45.58          | 7.15            | Forest         |
| 33 | Lavarone                | 45.96          | 11.28           | Forest         |
| 34 | Le Bray                 | 44.72          | -0.77           | Forest         |
| 35 | Loobos                  | 52.17          | 5.74            | Forest         |
| 36 | Mehrstedt               | 51.28          | 10.66           | Forest         |
| 37 | Mitra                   | 38.54          | -8.00           | Forest         |
| 38 | Nonantola               | 44.69          | 11.09           | Forest         |
| 39 | Norunda                 | 60.09          | 17.48           | Forest         |
| 40 | Parco Ticino            | 45.20          | 9.06            | Forest         |
| 41 | Popface alba            | 42.36          | 11.80           | Forest         |
| 42 | Popface euamericana     | 42.36          | 11.80           | Forest         |
| 43 | Popface nigra           | 42.36          | 11.80           | Forest         |
| 44 | Puechabon               | 43.72          | 3.58            | Forest         |
| 45 | Renon                   | 46.59          | 11.43           | Forest         |
| 46 | Roccarespampami 1       | 42.41          | 11.93           | Forest         |
| 47 | San Rossore             | 43.73          | 10.28           | Forest         |

Continued on next page

**Table S2 – continued from previous page**

| <b>ID</b> | <b>Site</b>  | <b>Latitude (° N)</b> | <b>Longitude (° E)</b> | <b>Ecosystem type</b> |
|-----------|--------------|-----------------------|------------------------|-----------------------|
| 48        | Skyttorp1    | 60.13                 | 17.92                  | Forest                |
| 49        | Skyttorp2    | 60.13                 | 17.84                  | Forest                |
| 50        | Sodankylä    | 67.36                 | 26.64                  | Forest                |
| 51        | Solling      | 51.82                 | 9.58                   | Forest                |
| 52        | Soroe        | 55.49                 | 11.65                  | Forest                |
| 53        | Tharandt     | 50.96                 | 13.57                  | Forest                |
| 54        | Vielsalm     | 50.31                 | 6.00                   | Forest                |
| 55        | Wet-T-57     | 50.45                 | 11.46                  | Forest                |
| 56        | Wytham Woods | 51.46                 | -1.32                  | Forest                |

Table S3: Gross primary production (GPP) sites from FLUXNET and ICOS (Pastorello et al., 2020).

| ID | Site                  | Latitude ( $^{\circ}$ N) | Longitude ( $^{\circ}$ E) | Ecosystem type | Source        |
|----|-----------------------|--------------------------|---------------------------|----------------|---------------|
| 1  | Sodankyla             | 67.36                    | 26.64                     | Forest         | FLUXNET       |
| 2  | Degero                | 64.18                    | 19.56                     | Grassland      | ICOS          |
| 3  | Hyytiala              | 61.85                    | 24.29                     | Forest         | FLUXNET       |
| 4  | Jokioinen             | 60.90                    | 23.51                     | Cropland       | FLUXNET       |
| 5  | Lettosuo              | 60.64                    | 23.96                     | Forest         | FLUXNET       |
| 6  | Norunda               | 60.09                    | 17.48                     | Forest         | ICOS          |
| 7  | Foulum                | 56.48                    | 9.59                      | Cropland       | FLUXNET       |
| 8  | Fyodorovskoye         | 56.46                    | 32.92                     | Forest         | FLUXNET       |
| 9  | Hyltemossa            | 56.10                    | 13.42                     | Forest         | ICOS          |
| 10 | Voulundgaard          | 56.04                    | 9.16                      | Cropland       | ICOS          |
| 11 | Enghave               | 55.69                    | 12.19                     | Grassland      | FLUXNET       |
| 12 | Soroe                 | 55.49                    | 11.64                     | Forest         | FLUXNET, ICOS |
| 13 | Horstermeer           | 52.24                    | 5.07                      | Grassland      | FLUXNET       |
| 14 | Loobos                | 52.17                    | 5.74                      | Forest         | FLUXNET       |
| 15 | Hohes Holz            | 52.09                    | 11.22                     | Forest         | ICOS          |
| 16 | Leinefelde            | 51.33                    | 10.37                     | Forest         | FLUXNET       |
| 17 | Brasschaat            | 51.31                    | 4.52                      | Forest         | FLUXNET, ICOS |
| 18 | Gebesee               | 51.10                    | 10.91                     | Cropland       | FLUXNET, ICOS |
| 19 | Hainich               | 51.08                    | 10.45                     | Forest         | FLUXNET       |
| 20 | Tharandt              | 50.96                    | 13.57                     | Forest         | FLUXNET, ICOS |
| 21 | Grillenburg           | 50.95                    | 13.51                     | Grassland      | FLUXNET       |
| 22 | Klingenberg           | 50.89                    | 13.52                     | Cropland       | FLUXNET       |
| 23 | Selhausen Juelich     | 50.87                    | 6.45                      | Cropland       | FLUXNET, ICOS |
| 24 | Selhausen             | 50.87                    | 6.45                      | Cropland       | FLUXNET       |
| 25 | Oberb.,renburg        | 50.79                    | 13.72                     | Forest         | FLUXNET       |
| 26 | Rollesbroich          | 50.62                    | 6.30                      | Grassland      | FLUXNET       |
| 27 | Lonzee                | 50.55                    | 4.75                      | Cropland       | FLUXNET, ICOS |
| 28 | Vielsalm              | 50.30                    | 6.00                      | Forest         | FLUXNET, ICOS |
| 29 | Bily Kriz forest      | 49.50                    | 18.54                     | Forest         | FLUXNET, ICOS |
| 30 | Bily Kriz grassland   | 49.49                    | 18.54                     | Grassland      | FLUXNET       |
| 31 | Lackenbergl           | 49.10                    | 13.30                     | Forest         | FLUXNET       |
| 32 | Grignon               | 48.84                    | 1.95                      | Cropland       | FLUXNET, ICOS |
| 33 | Lanzhot               | 48.68                    | 16.95                     | Forest         | ICOS          |
| 34 | Fontainebleau-Barbeau | 48.48                    | 2.78                      | Forest         | FLUXNET, ICOS |
| 35 | Laegern               | 47.48                    | 8.36                      | Forest         | FLUXNET       |
| 36 | Oensingen crop        | 47.29                    | 7.73                      | Cropland       | FLUXNET       |
| 37 | Oensingen grassland   | 47.29                    | 7.73                      | Grassland      | FLUXNET       |
| 38 | Chamau                | 47.21                    | 8.41                      | Grassland      | FLUXNET       |
| 39 | Frebel                | 47.12                    | 8.54                      | Grassland      | FLUXNET       |
| 40 | Davos                 | 46.82                    | 9.86                      | Forest         | FLUXNET       |
| 41 | Renon                 | 46.59                    | 11.43                     | Forest         | FLUXNET, ICOS |
| 42 | Monte Bondone         | 46.01                    | 11.05                     | Grassland      | FLUXNET       |
| 43 | Lavarone              | 45.96                    | 11.28                     | Forest         | FLUXNET       |
| 44 | Lavarone2             | 45.95                    | 11.29                     | Forest         | FLUXNET       |
| 45 | Torgnon               | 45.84                    | 7.58                      | Grassland      | FLUXNET       |
| 46 | Ispra ABC-IS          | 45.81                    | 8.63                      | Forest         | FLUXNET       |

Continued on next page

**Table S3 – continued from previous page**

| <b>ID Site</b>         | <b>Latitude (<math>^{\circ}</math> N)</b> | <b>Longitude (<math>^{\circ}</math> E)</b> | <b>Ecosystem type</b> | <b>Source</b> |
|------------------------|-------------------------------------------|--------------------------------------------|-----------------------|---------------|
| 47 Parco Ticino forest | 45.20                                     | 9.06                                       | Forest                | FLUXNET       |
| 48 Le Bray             | 44.72                                     | -0.77                                      | Forest                | FLUXNET       |
| 49 Bilos               | 44.49                                     | -0.96                                      | Forest                | ICOS          |
| 50 Puechabon           | 43.74                                     | 3.60                                       | Forest                | FLUXNET, ICOS |
| 51 San Rossore 2       | 43.73                                     | 10.29                                      | Forest                | FLUXNET       |
| 52 San Rossore         | 43.73                                     | 10.28                                      | Forest                | FLUXNET       |
| 53 Lamasquere          | 43.50                                     | 1.24                                       | Cropland              | ICOS          |
| 54 Roccarespampani 1   | 42.41                                     | 11.93                                      | Forest                | FLUXNET       |
| 55 Roccarespampani 2   | 42.39                                     | 11.92                                      | Forest                | FLUXNET       |
| 56 Castel d'Asso2      | 42.38                                     | 12.03                                      | Cropland              | FLUXNET       |
| 57 Castel d'Asso1      | 42.38                                     | 12.03                                      | Forest                | FLUXNET       |
| 58 Castel d'Asso3      | 42.38                                     | 12.02                                      | Forest                | FLUXNET       |
| 59 Collelongo          | 41.85                                     | 13.59                                      | Forest                | FLUXNET       |
| 60 Castelporziano      | 41.71                                     | 12.38                                      | Forest                | FLUXNET       |
| 61 Castelporziano2     | 41.70                                     | 12.36                                      | Forest                | FLUXNET, ICOS |
| 62 Borgo Cioffi        | 40.52                                     | 14.96                                      | Cropland              | FLUXNET       |



Table S4: Gross primary production (GPP) sites from Campioli et al. (2015).

| <b>ID</b> | <b>Site</b>          | <b>Latitude (° N)</b> | <b>Longitude (° E)</b> | <b>Ecosystem type</b> |
|-----------|----------------------|-----------------------|------------------------|-----------------------|
| 1         | Aurade               | 43.55                 | 1.11                   | Cropland              |
| 2         | Lamasquere           | 43.50                 | 1.24                   | Cropland              |
| 3         | Grignon              | 48.84                 | 1.95                   | Cropland              |
| 4         | Lonzee_winter_wheat  | 50.55                 | 4.74                   | Cropland              |
| 5         | Lonzee_sugar_beet    | 50.55                 | 4.74                   | Cropland              |
| 6         | Lonzee_potato        | 50.55                 | 4.74                   | Cropland              |
| 7         | Avignon              | 43.92                 | 4.88                   | Cropland              |
| 8         | Lutjewad             | 53.40                 | 6.36                   | Cropland              |
| 9         | Oensingen            | 47.29                 | 7.73                   | Cropland              |
| 10        | Gebesee              | 51.10                 | 10.91                  | Cropland              |
| 11        | Risbyholm            | 55.53                 | 12.10                  | Cropland              |
| 12        | Beano1               | 46.00                 | 13.02                  | Cropland              |
| 13        | Klingenberg          | 50.89                 | 13.52                  | Cropland              |
| 14        | Dooary               | 52.95                 | -7.25                  | Forest                |
| 15        | Wytham_Woods         | 51.46                 | -1.32                  | Forest                |
| 16        | Puechabon            | 43.74                 | 3.60                   | Forest                |
| 17        | Lochristi            | 51.11                 | 3.85                   | Forest                |
| 18        | Hesse                | 48.67                 | 7.07                   | Forest                |
| 19        | Bornhoved_Alder      | 54.10                 | 10.23                  | Forest                |
| 20        | Bornhoved_Beech      | 54.10                 | 10.23                  | Forest                |
| 21        | Hainich              | 51.08                 | 10.45                  | Forest                |
| 22        | Kannenbruch_AlderAsh | 53.78                 | 10.60                  | Forest                |
| 23        | Kannenbruch_Beech    | 53.78                 | 10.60                  | Forest                |
| 24        | Kannenbruch_Oak      | 53.78                 | 10.60                  | Forest                |
| 25        | Caldaro              | 46.35                 | 11.27                  | Forest                |
| 26        | Soroe                | 55.49                 | 11.64                  | Forest                |
| 27        | Popface_alba         | 42.36                 | 11.80                  | Forest                |
| 28        | Popface_euamericana  | 42.36                 | 11.80                  | Forest                |
| 29        | Popface_nigra        | 42.36                 | 11.80                  | Forest                |
| 30        | Tharandt             | 50.96                 | 13.57                  | Forest                |
| 31        | Collelongo           | 41.85                 | 13.59                  | Forest                |
| 32        | Flakaliden_C         | 64.11                 | 19.46                  | Forest                |
| 33        | Beano2               | 46.00                 | 13.02                  | Grassland             |
| 34        | Grillenburg          | 50.95                 | 13.51                  | Grassland             |
| 35        | Kursk                | 51.67                 | 36.50                  | Grassland             |

Table S5: List of studies included in the meta-analysis for different land-use change (LUC) transitions: cropland-to-grassland (C-to-G), grassland-to-cropland (G-to-C), cropland-to-forest (C-to-F), grassland-to-forest (G-to-F), and forest-to-cropland (F-to-C). Three designs include P—paired plots, C—chronosequences, or M—mono-site samplings;  $N$  is the number of samples.

| ID | Country                                                                                                      | Design | N  | Depth (cm) | LUC transitions                         | Reference                        |
|----|--------------------------------------------------------------------------------------------------------------|--------|----|------------|-----------------------------------------|----------------------------------|
| 1  | Italy                                                                                                        | P      | 5  | 30         | G-to-F,<br>C-to-F                       | Alberti et al. (2011)            |
| 2  | Italy                                                                                                        | C      | 10 | 30         | G-to-F                                  | Alberti et al. (2008)            |
| 3  | Crete                                                                                                        | C      | 2  | 15         | C-to-G                                  | Apostolakis et al. (2017)        |
| 4  | France                                                                                                       | P      | 14 | 50         | F-to-C                                  | Arrouays and Pelissier (1994)    |
| 5  | England                                                                                                      | C      | 12 | 40         | G-to-F,<br>C-to-F                       | Ashwood et al. (2019)            |
| 6  | Italy                                                                                                        | C      | 8  | 30         | C-to-F                                  | Badalamenti et al. (2019)        |
| 7  | Denmark                                                                                                      | C      | 30 | 25         | C-to-G,<br>C-to-F                       | Bárcena et al. (2014)            |
| 8  | Ireland                                                                                                      | C      | 5  | 30         | G-to-F                                  | Black et al. (2009)              |
| 9  | Germany                                                                                                      | C      | 7  | 20         | C-to-G                                  | Breuer et al. (2006)             |
| 10 | Turkey                                                                                                       | P      | 1  | 20         | G-to-C                                  | Celik (2005)                     |
| 11 | Germany                                                                                                      | P      | 12 | 20         | C-to-G                                  | Chen et al. (2009)               |
| 12 | Italy                                                                                                        | C      | 20 | 30         | G-to-F,<br>C-to-G,<br>C-to-F            | Tommaso et al. (2018)            |
| 13 | Russia                                                                                                       | C      | 4  | 20         | C-to-G                                  | lopes de Gerenyu et al. (2008)   |
| 14 | Italy                                                                                                        | M      | 2  | 30         | G-to-C,<br>C-to-F                       | Del Galdo et al. (2003)          |
| 15 | Germany                                                                                                      | P      | 2  | 50         | C-to-G                                  | Don et al. (2009)                |
| 16 | Turkey                                                                                                       | P      | 1  | 70         | F-to-G                                  | Gol and Dengiz (2008)            |
| 17 | Russia                                                                                                       | M      | 1  | 60         | F-to-G                                  | Heikkinen et al. (2014)          |
| 18 | Germany                                                                                                      | M      | 3  | 60         | G-to-C,<br>F-to-G                       | John et al. (2005)               |
| 19 | France                                                                                                       | M      | 6  | 25         | F-to-C                                  | Jolivet et al. (1997)            |
| 20 | France                                                                                                       | M      | 13 | 20         | F-to-C                                  | Jolivet et al. (2003)            |
| 21 | Germany                                                                                                      | M      | 3  | 30         | C-to-G                                  | Hofmann-Schielle et al. (1999)   |
| 22 | Sweden                                                                                                       | C      | 9  | 20         | G-to-C,<br>C-to-G                       | Kätterer et al. (2008)           |
| 23 | Russia                                                                                                       | M      | 3  | 20         | C-to-G                                  | Larionova et al. (2003)          |
| 24 | Germany                                                                                                      | P      | 4  | 30         | G-to-C,<br>C-to-G                       | Leifeld and Kögel-Knabner (2005) |
| 25 | Italy                                                                                                        | P      | 3  | 40         | G-to-C                                  | Papini et al. (2011)             |
| 26 | Ireland                                                                                                      | P      | 2  | 30         | G-to-F                                  | Peichl et al. (2012)             |
| 27 | Austria, Denmark,<br>Germany, Ireland,<br>Italy, Lithuania,<br>Netherlands, Scotland,<br>Sweden, Switzerland | P      | 24 | 80         | C-to-G,<br>G-to-C,<br>G-to-F,<br>C-to-F | Poeplau and Don (2013)           |
| 28 | England                                                                                                      | P      | 7  | 69         | C-to-F,<br>C-to-G                       | Poulton et al. (2003)            |
| 29 | Spain                                                                                                        | M      | 12 | 30         | C-to-F                                  | Romanyà et al. (2000)            |

Continued on next page

Table S5 – continued from previous page

| ID | Country                         | Design | N  | Depth<br>(cm) | LUC transitions | Reference                  |
|----|---------------------------------|--------|----|---------------|-----------------|----------------------------|
| 30 | Germany                         | C      | 7  | 29            | G-to-C          | Springob et al. (2001)     |
| 31 | Italy, Germany                  | C      | 26 | 50            | G-to-C          | Thuille and Schulze (2006) |
| 32 | Sweden, Denmark,<br>Netherlands | C      | 60 | 25            | C-to-F          | Vesterdal et al. (2007)    |
| 33 | Ireland                         | P      | 42 | 30            | G-to-F          | Wellock et al. (2011)      |
| 34 | England                         | C      | 4  | 10            | F-to-F          | Zerva et al. (2005)        |

Table S6: The observed carbon response function (CRF) and the leave-one-out coefficient of determination ( $R^2$ ) measure for each land-use change (LUC) scenario in meta-analyses. ( $R^2$  values range from 0 to 1, where values closer to 1 indicate better predictive performance of the model.)

| LUC                                                        | ID                     | Model                                 | $R^2$ |
|------------------------------------------------------------|------------------------|---------------------------------------|-------|
| Cropland-to-grassland                                      | C-to-G                 | $0.85 \times \text{age} + 11.75$      | 0.57  |
| Grassland-to-cropland                                      | G-to-C                 | $-13.92 \times e^{\text{age}/133.80}$ | 0.62  |
| Grassland-to-forest (mineral soil or without forest floor) | G-to-F <sub>woFF</sub> | $-0.10 \times \text{age} + 3.54$      | 0.89  |
| Grassland to forest (with forest floor)                    | G-to-F <sub>wFF</sub>  | $0.03 \times \text{age} + 2.24$       | 0.58  |
| Cropland-to-forest (mineral soil)                          | C-to-F <sub>woFF</sub> | $0.74 \times \text{age} - 5.78$       | 0.99  |
| Cropland-to-forest (with forest floor)                     | C-to-F <sub>wFF</sub>  | $1.09 \times \text{age} + 3.54$       | 0.52  |
| Forest-to-cropland (mineral soil)                          | F-to-C <sub>woFF</sub> | $-1.10 \times \text{age} - 16.03$     | 0.98  |

Table S7: The leave-one-out coefficient of determination ( $R^2$ ) and root mean square error (RMSE in  $kg\ m^{-2}$ ) between the random forest regression and model bias for each land-use change (LUC) scenario. Results with negative  $R^2$ , indicating poor regression, are not shown. Two distinct forest types, namely temperate broadleaf summergreen (TeBS) and temperate needleleaf evergreen (TeNE), are considered for the forest sites.

| Forest type | LUC                                                        | ID                     | $R^2$ | RMSE |
|-------------|------------------------------------------------------------|------------------------|-------|------|
| TeBS        | Cropland-to-grassland                                      | C-to-G                 | 0.13  | 1.25 |
|             | Grassland-to-cropland                                      | G-to-C                 | 0.44  | 1.08 |
|             | Grassland to forest (mineral soil or without forest floor) | G-to-F <sub>woFF</sub> | 0.19  | 3.59 |
|             | Grassland-to-forest (with forest floor)                    | G-to-F <sub>wFF</sub>  | -     | -    |
|             | Cropland-to-forest (mineral soil)                          | C-to-F <sub>woFF</sub> | 0.26  | 1.92 |
| TeNE        | Cropland-to-forest (with forest floor)                     | C-to-F <sub>wFF</sub>  | -     | -    |
|             | Forest-to-cropland (mineral soil)                          | F-to-C <sub>woFF</sub> | 0.11  | 3.03 |
|             | Grassland to forest (mineral soil or without forest floor) | G-to-F <sub>woFF</sub> | 0.18  | 3.58 |
|             | Grassland-to-forest (with forest floor)                    | G-to-F <sub>wFF</sub>  | -     | -    |
|             | Cropland-to-forest (mineral soil)                          | C-to-F <sub>woFF</sub> | 0.19  | 2.03 |
|             | Cropland-to-forest (with forest floor)                     | C-to-F <sub>wFF</sub>  | -     | -    |
|             | Forest-to-cropland (mineral soil)                          | F-to-C <sub>woFF</sub> | 0.18  | 3.14 |

Table S8: Correlation (COR) and root mean square error (RMSE in  $kg\ m^{-2}$ ) between observed and simulated soil organic carbons ( $SOC_{LUCAS\ topsoil}$  and  $SOC_{derived\ ORC}$ ) at different grid scales (from  $0.5^\circ \times 0.5^\circ$  to  $3^\circ \times 3^\circ$  cells), for three groups of vegetation (forest, grass, and crop).

| Grid scale                   | Forest |                          |              | Grass |                          |              | Crop |                          |              |
|------------------------------|--------|--------------------------|--------------|-------|--------------------------|--------------|------|--------------------------|--------------|
|                              | COR    | RMSE<br>( $kg\ m^{-2}$ ) | rRMSE<br>(%) | COR   | RMSE<br>( $kg\ m^{-2}$ ) | rRMSE<br>(%) | COR  | RMSE<br>( $kg\ m^{-2}$ ) | rRMSE<br>(%) |
| $0.5^\circ \times 0.5^\circ$ | 0.17   | 2.82                     | 59.15        | 0.53  | 1.57                     | 39.38        | 0.42 | 1.18                     | 35.98        |
| $1^\circ \times 1^\circ$     | 0.26   | 2.57                     | 52.87        | 0.56  | 1.43                     | 35.41        | 0.47 | 1.04                     | 30.78        |
| $2^\circ \times 2^\circ$     | 0.39   | 2.48                     | 48.21        | 0.52  | 1.31                     | 31.77        | 0.54 | 0.91                     | 26.6         |
| $3^\circ \times 3^\circ$     | 0.45   | 2.36                     | 45.59        | 0.68  | 1.14                     | 27.43        | 0.59 | 0.88                     | 25.39        |

## References

- Alberti, G., Peressotti, A., Piussi, P., and Zerbi, G.: Forest ecosystem carbon accumulation during a secondary succession in the Eastern Prealps of Italy, *Forestry: An International Journal of Forest Research*, 81, 1–11, <https://doi.org/10.1093/forestry/cpm026>, 2008.
- Alberti, G., Leronni, V., Piazzini, M., Petrella, F., Mairota, P., Peressotti, A., Piussi, P., Valentini, R., Gristina, L., La Mantia, T., Novara, A., and Rühl, J.: Impact of woody encroachment on soil organic carbon and nitrogen in abandoned agricultural lands along a rainfall gradient in Italy, *Regional Environmental Change*, 11, 917–924, <https://doi.org/10.1007/s10113-011-0229-6>, 2011.
- Apostolakis, A., Panakoulia, S., Nikolaidis, N. P., and Paranychianakis, N. V.: Shifts in soil structure and soil organic matter in a chronosequence of set-aside fields, *Soil and Tillage Research*, 174, 113–119, <https://doi.org/https://doi.org/10.1016/j.still.2017.07.004>, 2017.
- Arrouays, D. and Pelissier, P.: Changes in carbon storage in temperate humic loamy soils after forest clearing and continuous corn cropping in France, *Plant and Soil*, 160, 215–223, <https://doi.org/10.1007/BF00010147>, 1994.
- Ashwood, F., Watts, K., Park, K., Fuentes-Montemayor, E., Benham, S., and Vanguelova, E. I.: Woodland restoration on agricultural land: long-term impacts on soil quality, *Restoration Ecology*, 27, 1381–1392, <https://doi.org/https://doi.org/10.1111/rec.13003>, 2019.
- Badalamenti, E., Battipaglia, G., Gristina, L., Novara, A., Rühl, J., Sala, G., Sapienza, L., Valentini, R., and La Mantia, T.: Carbon stock increases up to old growth forest along a secondary succession in Mediterranean island ecosystems, *PLOS ONE*, 14, 1–13, <https://doi.org/10.1371/journal.pone.0220194>, 2019.
- Black, K., Byrne, K. A., Mencuccini, M., Tobin, B., Nieuwenhuis, M., Reidy, B., Bolger, T., Saiz, G., Green, C., Farrell, E. T., and Osborne, B.: Carbon stock and stock changes across a Sitka spruce chronosequence on surface-water gley soils, *Forestry: An International Journal of Forest Research*, 82, 255–272, <https://doi.org/10.1093/forestry/cpp005>, 2009.
- Breuer, L., Huisman, J., Keller, T., and Frede, H.-G.: Impact of a conversion from cropland to grassland on C and N storage and related soil properties: Analysis of a 60-year chronosequence, *Geoderma*, 133, 6–18, <https://doi.org/https://doi.org/10.1016/j.geoderma.2006.03.033>, advances in landscape-scale soil research, 2006.
- Bárcena, T. G., Gundersen, P., and Vesterdal, L.: Afforestation effects on SOC in former cropland: oak and spruce chronosequences resampled after 13 years, *Global Change Biology*, 20, 2938–2952, <https://doi.org/https://doi.org/10.1111/gcb.12608>, 2014.
- Campioli, M., Vicca, S., Luyssaert, S., Bilcke, J., Ceschia, E., Chapin III, F. S., Ciais, P., Fernández-Martínez, M., Malhi, Y., Obersteiner, M., Olefeldt, D., Papale, D., Piao, S. L., Peñuelas, J., Sullivan, P. F., Wang, X., Zenone, T., and Janssens, I. A.: Biomass production efficiency controlled by management in temperate and boreal ecosystems, *Nature Geoscience*, 8, 843–846, <https://doi.org/10.1038/ngeo2553>, 2015.
- Celik, I.: Land-use effects on organic matter and physical properties of soil in a southern Mediterranean highland of Turkey, *Soil and Tillage Research*, 83, 270–277, <https://doi.org/https://doi.org/10.1016/j.still.2004.08.001>, 2005.
- Chen, H., Marhan, S., Billen, N., and Stahr, K.: Soil organic-carbon and total nitrogen stocks as affected by different land uses in Baden-Württemberg (southwest Germany), *Journal of Plant Nutrition and Soil Science*, 172, 32–42, <https://doi.org/https://doi.org/10.1002/jpln.200700116>, 2009.

- Del Galdo, I., Six, J., Peressotti, A., and Francesca Cotrufo, M.: Assessing the impact of land-use change on soil C sequestration in agricultural soils by means of organic matter fractionation and stable C isotopes, *Global Change Biology*, 9, 1204–1213, <https://doi.org/https://doi.org/10.1046/j.1365-2486.2003.00657.x>, 2003.
- Don, A., Scholten, T., and Schulze, E.-D.: Conversion of cropland into grassland: Implications for soil organic-carbon stocks in two soils with different texture, *Journal of Plant Nutrition and Soil Science*, 172, 53–62, <https://doi.org/https://doi.org/10.1002/jpln.200700158>, 2009.
- Gol, C. and Dengiz, O.: Effect of modifying land cover and long-term agricultural practices on the soil characteristics in native forest-land, *J Environ Biol*, 29, 677–682, 2008.
- Heikkinen, J., Kurganova, I., Lopes de Gerenyu, V., Palosuo, T., and Regina, K.: Changes in soil carbon stock after cropland conversion to grassland in Russian temperate zone: measurements versus model simulation, *Nutrient Cycling in Agroecosystems*, 98, 97–106, <https://doi.org/10.1007/s10705-014-9599-8>, 2014.
- Hofmann-Schielle, C., Jug, A., Makeschin, F., and Rehfuss, K.: Short-rotation plantations of balsam poplars, aspen and willows on former arable land in the Federal Republic of Germany. I. Site-growth relationships, *Forest Ecology and Management*, 121, 41–55, [https://doi.org/https://doi.org/10.1016/S0378-1127\(98\)00555-6](https://doi.org/https://doi.org/10.1016/S0378-1127(98)00555-6), 1999.
- John, B., Yamashita, T., Ludwig, B., and Flessa, H.: Storage of organic carbon in aggregate and density fractions of silty soils under different types of land use, *Geoderma*, 128, 63–79, <https://doi.org/https://doi.org/10.1016/j.geoderma.2004.12.013>, mechanisms and regulation of organic matter stabilisation in soils, 2005.
- Jolivet, C., Arrouays, D., Andreux, F., and Lévêque, J.: Soil organic carbon dynamics in cleared temperate forest spodosols converted to maize cropping, *Plant and Soil*, 191, 225–231, <https://doi.org/10.1023/A:1004294822799>, 1997.
- Jolivet, C., Arrouays, D., Lévêque, J., Andreux, F., and Chenu, C.: Organic carbon dynamics in soil particle-size separates of sandy Spodosols when forest is cleared for maize cropping, *European Journal of Soil Science*, 54, 257–268, <https://doi.org/https://doi.org/10.1046/j.1365-2389.2003.00541.x>, 2003.
- Kätterer, T., Andersson, L., Andrén, O., and Persson, J.: Long-term impact of chronosequential land use change on soil carbon stocks on a Swedish farm, *Nutrient Cycling in Agroecosystems*, 81, 145–155, <https://doi.org/10.1007/s10705-007-9156-9>, 2008.
- Larionova, A. A., Rozanova, L. N., Yevdokimov, I. V., Yermolayev, A. M., Kurganova, I. N., and Blagodatsky, S. A.: Land-use change and management effects on carbon sequestration in soils of Russia's South Taiga zone, *Tellus B*, 55, 331–337, <https://doi.org/https://doi.org/10.1034/j.1600-0889.2003.00042.x>, 2003.
- Leifeld, J. and Kögel-Knabner, I.: Soil organic matter fractions as early indicators for carbon stock changes under different land-use?, *Geoderma*, 124, 143–155, <https://doi.org/https://doi.org/10.1016/j.geoderma.2004.04.009>, 2005.
- lopes de Gerenyu, V., Kurganova, I., and Kuzyakov, Y.: Carbon pool and sequestration in former arable Chernozems depending on restoration period, *Ekologija*, 54, 232–238, <https://doi.org/10.2478/v10055-008-0034-9>, 2008.
- Luyssaert, S., Inghima, I., Jung, M., Richardson, A., Reichsteins, M., Papale, D., Piao, S., Schulzes, E., Wingate, L., Matteucci, G., Aragao, L., Aubinet, M., Beers, C., Bernhoffer, C., Black, K., Bonal, D., Bonnefond, J., Chambers, J., Ciais, P., Cook, B., Davis, K.,

Dolman, A., Gielen, B., Goulden, M., Grace, J., Granier, A., Grelle, A., Griffis, T., Gruenewald, T., Guidolotti, G., Hanson, P., Harding, R., Hollinger, D., Hutrya, L., Kolar, P., Kruijt, B., Kutsch, W., Lagergren, F., Laurila, T., Law, B., Le Maire, G., Lindroth, A., Loustau, D., Malhi, Y., Mateus, J., Migliavacca, M., Misson, L., Montagnani, L., Moncrieff, J., Moors, E., Munger, J., Nikinmaa, E., Ollinger, S., Pita, G., Rebmann, C., Rouspard, O., Saigusa, N., Sanz, M., Seufert, G., Sierra, C., Smith, M., Tang, J., Valentini, R., Vesala, T., and Janssens, I.: CO<sub>2</sub> balance of boreal, temperate, and tropical forests derived from a global database, *Global Change Biology*, 13, 2509–2537, <https://doi.org/https://doi.org/10.1111/j.1365-2486.2007.01439.x>, 2007.

Papini, R., Valboa, G., Favilli, F., and L'Abate, G.: Influence of land use on organic carbon pool and chemical properties of Vertic Cambisols in central and southern Italy, *Agriculture, Ecosystems and Environment*, 140, 68–79, <https://doi.org/https://doi.org/10.1016/j.agee.2010.11.013>, 2011.

Pastorello, G., Trotta, C., Canfora, E., Chu, H., Christianson, D., Cheah, Y.-W., Poindexter, C., Chen, J., Elbashandy, A., Humphrey, M., Isaac, P., Polidori, D., Reichstein, M., Ribeca, A., van Ingen, C., Vuichard, N., Zhang, L., Amiro, B., Ammann, C., Arain, M. A., Ardö, J., Arkebauer, T., Arndt, S. K., Arriga, N., Aubinet, M., Aurela, M., Baldocchi, D., Barr, A., Beamesderfer, E., Marchesini, L. B., Bergeron, O., Beringer, J., Bernhofer, C., Berveiller, D., Billesbach, D., Black, T. A., Blanken, P. D., Bohrer, G., Boike, J., Bolstad, P. V., Bonal, D., Bonnefond, J.-M., Bowling, D. R., Bracho, R., Brodeur, J., Brümmer, C., Buchmann, N., Burban, B., Burns, S. P., Buysse, P., Cale, P., Cavagna, M., Cellier, P., Chen, S., Chini, I., Christensen, T. R., Cleverly, J., Collalti, A., Consalvo, C., Cook, B. D., Cook, D., Coursolle, C., Cremonese, E., Curtis, P. S., D'Andrea, E., da Rocha, H., Dai, X., Davis, K. J., Cinti, B. D., Grandcourt, A. d., Ligne, A. D., De Oliveira, R. C., Delpierre, N., Desai, A. R., Di Bella, C. M., Tommasi, P. d., Dolman, H., Domingo, F., Dong, G., Dore, S., Duce, P., Dufrêne, E., Dunn, A., Dušek, J., Eamus, D., Eichelmann, U., ElKhidir, H. A. M., Eugster, W., Ewenz, C. M., Ewers, B., Famulari, D., Fares, S., Feigenwinter, I., Feitz, A., Fensholt, R., Filippa, G., Fischer, M., Frank, J., Galvagno, M., Gharun, M., Gianelle, D., Gielen, B., Gioli, B., Gitelson, A., Goded, I., Goeckede, M., Goldstein, A. H., Gough, C. M., Goulden, M. L., Graf, A., Griebel, A., Gruening, C., Grünwald, T., Hammerle, A., Han, S., Han, X., Hansen, B. U., Hanson, C., Hatakka, J., He, Y., Hehn, M., Heinesch, B., Hinko-Najera, N., Hörtnagl, L., Hutley, L., Ibrom, A., Ikawa, H., Jackowicz-Korczynski, M., Janouš, D., Jans, W., Jassal, R., Jiang, S., Kato, T., Khomik, M., Klatt, J., Knohl, A., Knox, S., Kobayashi, H., Koerber, G., Kolle, O., Kosugi, Y., Kotani, A., Kowalski, A., Kruijt, B., Kurbatova, J., Kutsch, W. L., Kwon, H., Launiainen, S., Laurila, T., Law, B., Leuning, R., Li, Y., Liddell, M., Limousin, J.-M., Lion, M., Liska, A. J., Lohila, A., López-Ballesteros, A., López-Blanco, E., Loubet, B., Loustau, D., Lucas-Moffat, A., Lüers, J., Ma, S., Macfarlane, C., Magliulo, V., Maier, R., Mammarella, I., Manca, G., Marcolla, B., Margolis, H. A., Marras, S., Massman, W., Mastepanov, M., Matamala, R., Matthes, J. H., Mazzenga, F., McCaughey, H., McHugh, I., McMillan, A. M. S., Merbold, L., Meyer, W., Meyers, T., Miller, S. D., Minerbi, S., Moderow, U., Monson, R. K., Montagnani, L., Moore, C. E., Moors, E., Moreaux, V., Moureaux, C., Munger, J. W., Nakai, T., Neiryneck, J., Nesic, Z., Nicolini, G., Noormets, A., Northwood, M., Noretto, M., Nouvellon, Y., Novick, K., Oechel, W., Olesen, J. E., Ourcival, J.-M., Papuga, S. A., Parmentier, F.-J., Paul-Limoges, E., Pavelka, M., Peichl, M., Pendall, E., Phillips, R. P., Pilegaard, K., Pirk, N., Posse, G., Powell, T., Prasse, H., Prober, S. M., Rambal, S., Rannik, Ü., Raz-Yaseef, N., Rebmann, C., Reed, D., Dios, V. R. d., Restrepo-Coupe, N., Reverter, B. R., Roland, M., Sabbatini, S., Sachs, T., Saleska, S. R., Sánchez-Cañete, E. P., Sanchez-Mejia, Z. M., Schmid, H. P., Schmidt, M., Schneider, K., Schrader, F., Schroder, I., Scott, R. L., Sedláč, P., Serrano-Ortíz, P., Shao, C., Shi, P., Shironya, I., Siebicke, L., Šigut, L., Silberstein, R., Sirca, C., Spano, D., Steinbrecher, R., Stevens,

- R. M., Sturtevant, C., Suyker, A., Tagesson, T., Takanashi, S., Tang, Y., Tapper, N., Thom, J., Tomassucci, M., Tuovinen, J.-P., Urbanski, S., Valentini, R., van der Molen, M., van Gorsel, E., van Huissteden, K., Varlagin, A., Verfaillie, J., Vesala, T., Vincke, C., Vitale, D., Vygodskaya, N., Walker, J. P., Walter-Shea, E., Wang, H., Weber, R., Westermann, S., Wille, C., Wofsy, S., Wohlfahrt, G., Wolf, S., Woodgate, W., Li, Y., Zampedri, R., Zhang, J., Zhou, G., Zona, D., Agarwal, D., Biraud, S., Torn, M., and Papale, D.: The FLUXNET2015 dataset and the ONEFlux processing pipeline for eddy covariance data, *Scientific Data*, 7, 225, <https://doi.org/10.1038/s41597-020-0534-3>, 2020.
- Peichl, M., Leava, N. A., and Kiely, G.: Above- and belowground ecosystem biomass, carbon and nitrogen allocation in recently afforested grassland and adjacent intensively managed grassland, *Plant and Soil*, 350, 281–296, <https://doi.org/10.1007/s11104-011-0905-9>, 2012.
- Poeplau, C. and Don, A.: Sensitivity of soil organic carbon stocks and fractions to different land-use changes across Europe, *Geoderma*, 192, 189–201, <https://doi.org/https://doi.org/10.1016/j.geoderma.2012.08.003>, 2013.
- Poulton, P. R., Pye, E., Hargreaves, P. R., and Jenkinson, D. S.: Accumulation of carbon and nitrogen by old arable land reverting to woodland, *Global Change Biology*, 9, 942–955, <https://doi.org/https://doi.org/10.1046/j.1365-2486.2003.00633.x>, 2003.
- Romanyà, J., Cortina, J., Falloon, P., Coleman, K., and Smith, P.: Modelling changes in soil organic matter after planting fast-growing *Pinus radiata* on Mediterranean agricultural soils, *European Journal of Soil Science*, 51, 627–641, <https://doi.org/https://doi.org/10.1111/j.1365-2389.2000.00343.x>, 2000.
- Springob, G., Brinkmann, S., Engel, N., Kirchmann, H., and Böttcher, J.: Organic C levels of Ap horizons in North German Pleistocene sands as influenced by climate, texture, and history of land-use, *Journal of Plant Nutrition and Soil Science*, 164, 681–690, [https://doi.org/https://doi.org/10.1002/1522-2624\(200112\)164:6;681::AID-JPLN681;3.0.CO;2-V](https://doi.org/https://doi.org/10.1002/1522-2624(200112)164:6;681::AID-JPLN681;3.0.CO;2-V), 2001.
- Thuille, A. and Schulze, E.-D.: Carbon dynamics in successional and afforested spruce stands in Thuringia and the Alps, *Global Change Biology*, 12, 325–342, <https://doi.org/https://doi.org/10.1111/j.1365-2486.2005.01078.x>, 2006.
- Tommaso, C., Emanuele, B., Guido, P., Lucia, P., Vincenza, C. M., and Riccardo, V.: Soil organic carbon pool's contribution to climate change mitigation on marginal land of a Mediterranean montane area in Italy, *Journal of Environmental Management*, 218, 593–601, <https://doi.org/https://doi.org/10.1016/j.jenvman.2018.04.093>, 2018.
- Vesterdal, L., Rosenqvist, L., Van Der Salm, C., Hansen, K., Groenenberg, B. J., and Johansson, M. B.: Carbon Sequestration in Soil and Biomass Following Afforestation: Experiences from Oak and Norway Spruce Chronosequences in Denmark, Sweden and the Netherlands, pp. 19–51, Springer Netherlands, [https://doi.org/10.1007/1-4020-4568-9\\_2](https://doi.org/10.1007/1-4020-4568-9_2), 2007.
- Wellock, M. L., LaPerle, C. M., and Kiely, G.: What is the impact of afforestation on the carbon stocks of Irish mineral soils?, *Forest Ecology and Management*, 262, 1589–1596, <https://doi.org/https://doi.org/10.1016/j.foreco.2011.07.007>, 2011.
- Zerva, A., Ball, T., Smith, K. A., and Mencuccini, M.: Soil carbon dynamics in a Sitka spruce (*Picea sitchensis* (Bong.) Carr.) chronosequence on a peaty gley, *Forest Ecology and Management*, 205, 227–240, <https://doi.org/https://doi.org/10.1016/j.foreco.2004.10.035>, 2005.



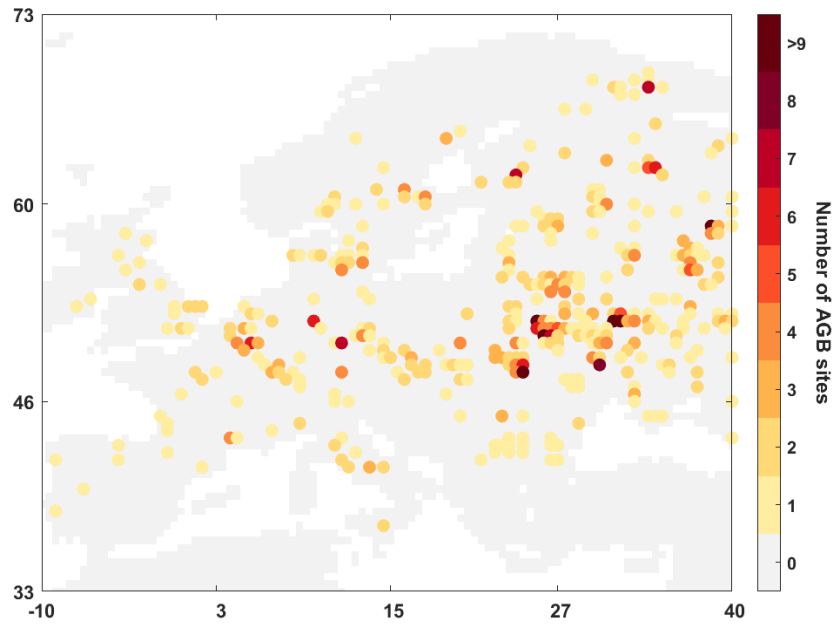

Figure S1: Map showing the observed above-ground biomass (AGB) sites included in the study.

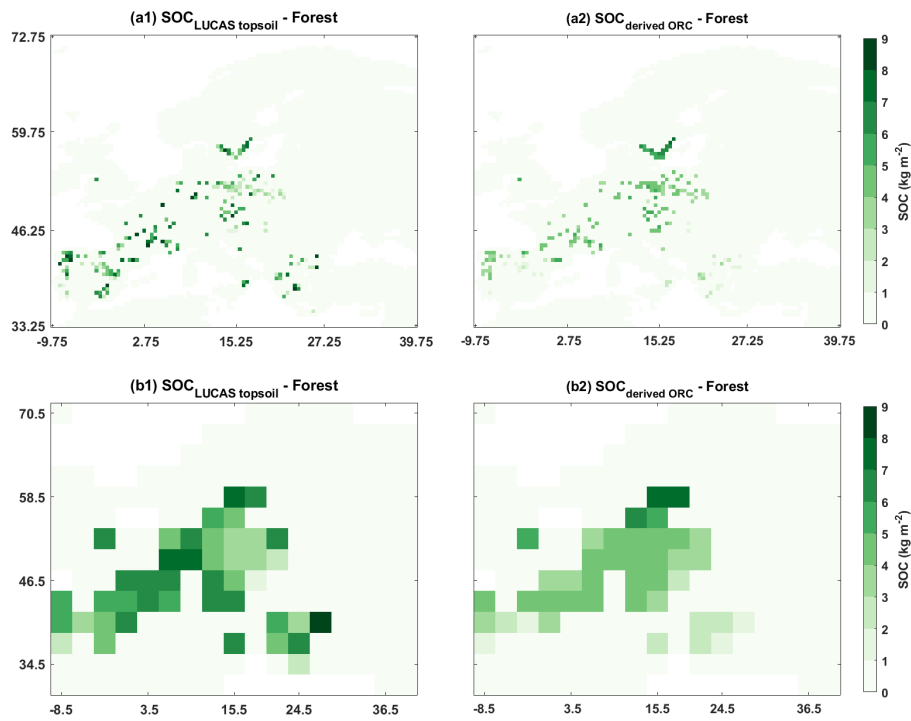

Figure S2: Maps showing the comparison between soil organic carbon of LUCAS topsoil and corresponding ORCHIDEE values ( $SOC_{LUCAS\ topsoil}$  (a1,b1) and  $SOC_{derived\ ORC}$  (a2,b2), in  $kg\ m^{-2}$ ) at different grid scales ( $0.5^\circ \times 0.5^\circ$  (a1, a2) and  $3^\circ \times 3^\circ$  (b1,b2)) for forest sites.

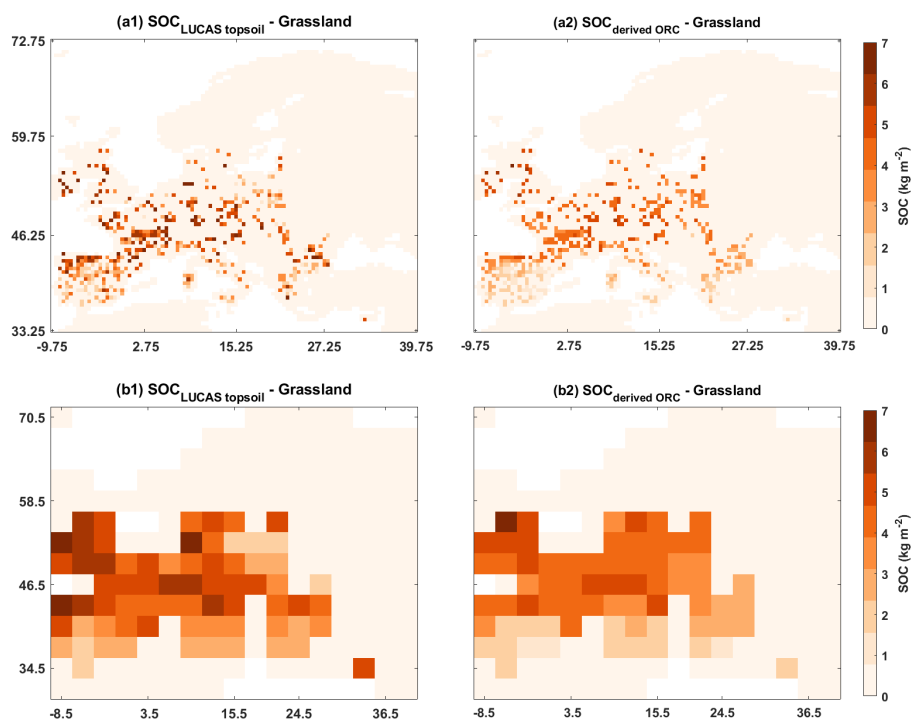

Figure S3: Same as Fig. S2, but for grassland sites.

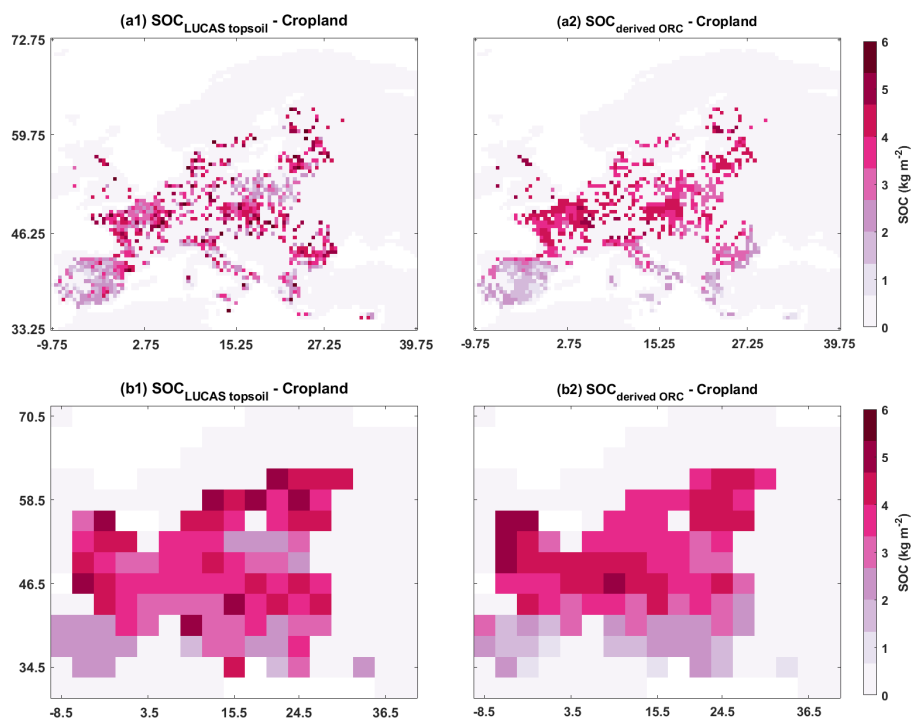

Figure S4: Same as Fig. S2, but for cropland sites.

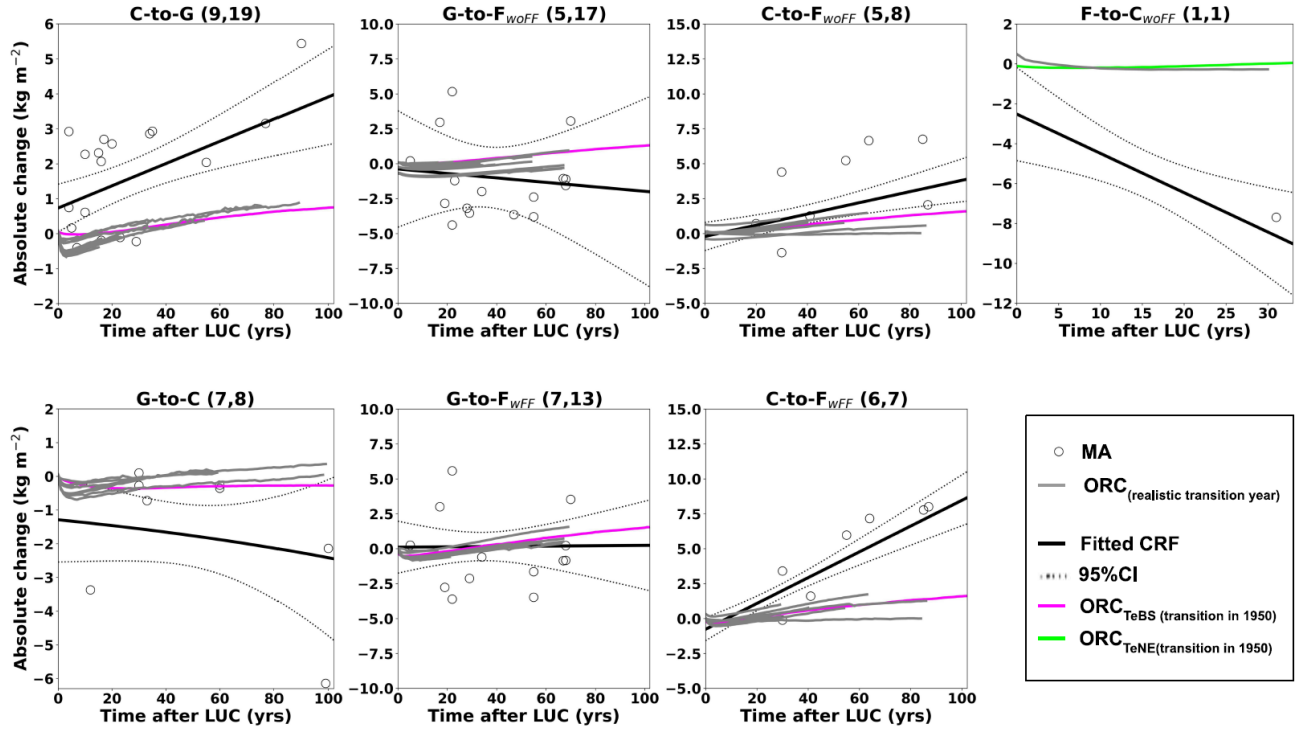

Figure S5: The absolute soil organic carbon changes (in  $kg\ m^{-2}$ ) from site observations in meta-analyses (black circles) compared to corresponding ORCHIDEE simulated data (grey lines) for different land-use changes (LUCs: cropland-to-grassland ( $C - to - G$ ), grassland-to-cropland ( $G - to - C$ ), grassland-to-forest (without and with forest floor  $G - to - F_{woff}$ ,  $G - to - F_{wff}$ ), cropland-to-forest ( $C - to - F_{woff}$  and  $C - to - F_{wff}$ ), and forest-to-cropland ( $F - to - C_{woff}$ ). The first number in the parenthesis indicates the number of study sites, and the second is the number of samples in the meta-analyses. Here, temperate broadleaf summergreen ( $ORC_{TeBS}$ ) is considered for the forest sites in all ORCHIDEE simulations, except for  $F - to - C_{woff}$  in which temperate needleleaf evergreen ( $ORC_{TeNE}$ ) is considered. The fitted carbon response functions (CRFs, black lines)  $\pm 95\%$  confidence interval (black dotted lines) and simulated CRFs (magenta and green line) corresponding to all observation samples (Tab. S6, Fig. 6) are included here for comparison.
